# Supplementary material for: Promising Ce single-atom-dispersed nitrogen-doped graphene catalysts for the hydrogen evolution reaction
Source: Royal Society of Chemistry journal article supplement (doi:10.1039/d3ma00536d), 2023-01-01
Supplement: d3ma00536d1.pdf [file d3ma00536d1.pdf]

Electronic supplementary information *for*

**Promising Ce single-atom-dispersed nitrogen-doped graphene catalysts for hydrogen evolution reaction**

Sunny Yadav, Vandung Dao, Wenmeng Wang, Kai Chen, Chiyeop Kim, Gyu-Cheol Kim,  
and In-Hwan Lee\*

*Department of Materials Science and Engineering, Korea University, Seoul 02841, Republic of Korea. E-mail: [ihlee@korea.ac.kr](mailto:ihlee@korea.ac.kr)*

## Table of Contents

| <b>S. No.</b> | <b>Title</b>                                                                        | <b>Page No.</b> |
|---------------|-------------------------------------------------------------------------------------|-----------------|
| 1             | Turnover Frequency                                                                  | S3              |
| 2             | Schematic for Ce/NGr                                                                | S4              |
| 3             | EDS Spectrum for free-standing NGr                                                  | S5              |
| 4             | EDS Spectrum for Ce/NGr                                                             | S6              |
| 5             | HR-TEM images                                                                       | S7              |
| 6             | STEM images of NGr and Ce/NGr                                                       | S8              |
| 7             | HER, Mass density and EIS measurements of NGr, 1Ce/NGr, and 3Ce/NGr                 | S9              |
| 8             | CV cycle of Pt/C, NGr, 1Ce/NGr, and 3Ce/NGr                                         | S10             |
| 9             | I-t graph of NGr and 3Ce/NGr                                                        | S11             |
| 10            | Electrochemical measurement of Ni foam, NGr, 1Ce/NGr and 3Ce/NGr using graphite rod | S12             |
| 11            | CV cycle of NGr, 1Ce/NGr, and 3Ce/NGr                                               | S13             |
| 12            | FE-SEM, STEM, and XPS data after stability test of 1Ce/NGr and 3Ce/NGr.             | S14             |
| 13            | FE-SEM images of Ce/NGr after stability test                                        | S15             |
| 14            | EDS Spectrum for free-standing NGr after stability test                             | S16             |
| 15            | EDS Spectrum for free standing Ce/NGr after stability test                          | S17             |
| 16            | Comparison of HER active catalysts                                                  | S18             |
| 17            | References                                                                          | S19             |

## Turnover Frequency (TOF)

The amount of oxygen/hydrogen evolved per unit of time of the catalyst can be determined by the below expression,

$$\text{TOF} = j \times N_A / n \times F \times \tau \dots\dots\dots \text{equation 1}$$

where,  $j$  = current density,  $N_A$  = Avogadro number,  $F$  = Faraday constant (96 485 C mol<sup>-1</sup>),  $n$  = Number of electrons (For OER,  $n = 4$  and HER,  $n = 2$ ),  $\Gamma$  = Surface concentration.

Determination of Surface concentration from the redox feature of CV:

The calculated area associated with the reduction of Ce<sup>4+</sup>/Ce<sup>3+</sup> of 1Ce/NGr = 0.0002764VA

Hence, the associated charge is = 0.0002764VA / 0.1 Vs<sup>-1</sup>

$$= 0.002764 \text{ As}$$

$$= 0.002764 \text{ C}$$

Now, the number of electron transferred is = 0.002764 C / 1.602 × 10<sup>-19</sup> C

$$= 1.725 \times 10^{16} \text{ C}$$

Since the reduction of Ce<sup>4+</sup>/Ce<sup>3+</sup> is a single electron transfer reaction, the number of electrons calculated above is the same as the number of surface-active sites.

Hence, the number of Ce participate in HER is = 1.725 × 10<sup>16</sup> C

The TOF values for 1Ce/NGr, 3Ce/NGr, and NGr were calculated from the redox feature, and the calculated values are 3.16 sec<sup>-1</sup>, 3.0 sec<sup>-1</sup>, and 0.238 sec<sup>-1</sup>.

## 2. Schematic for Ce/NGr

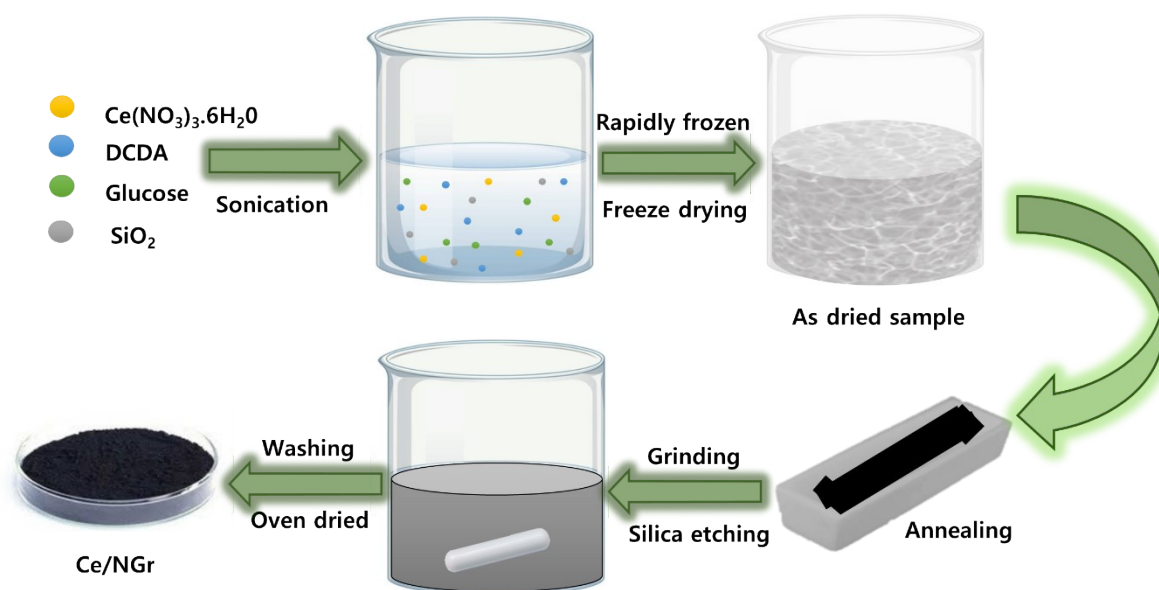

**Fig. S1.** Schematic of preparation process of rare-earth Ce single atom dispersed on NGr (Ce/NGr).

### 3. EDS Spectrum for free-standing NGr

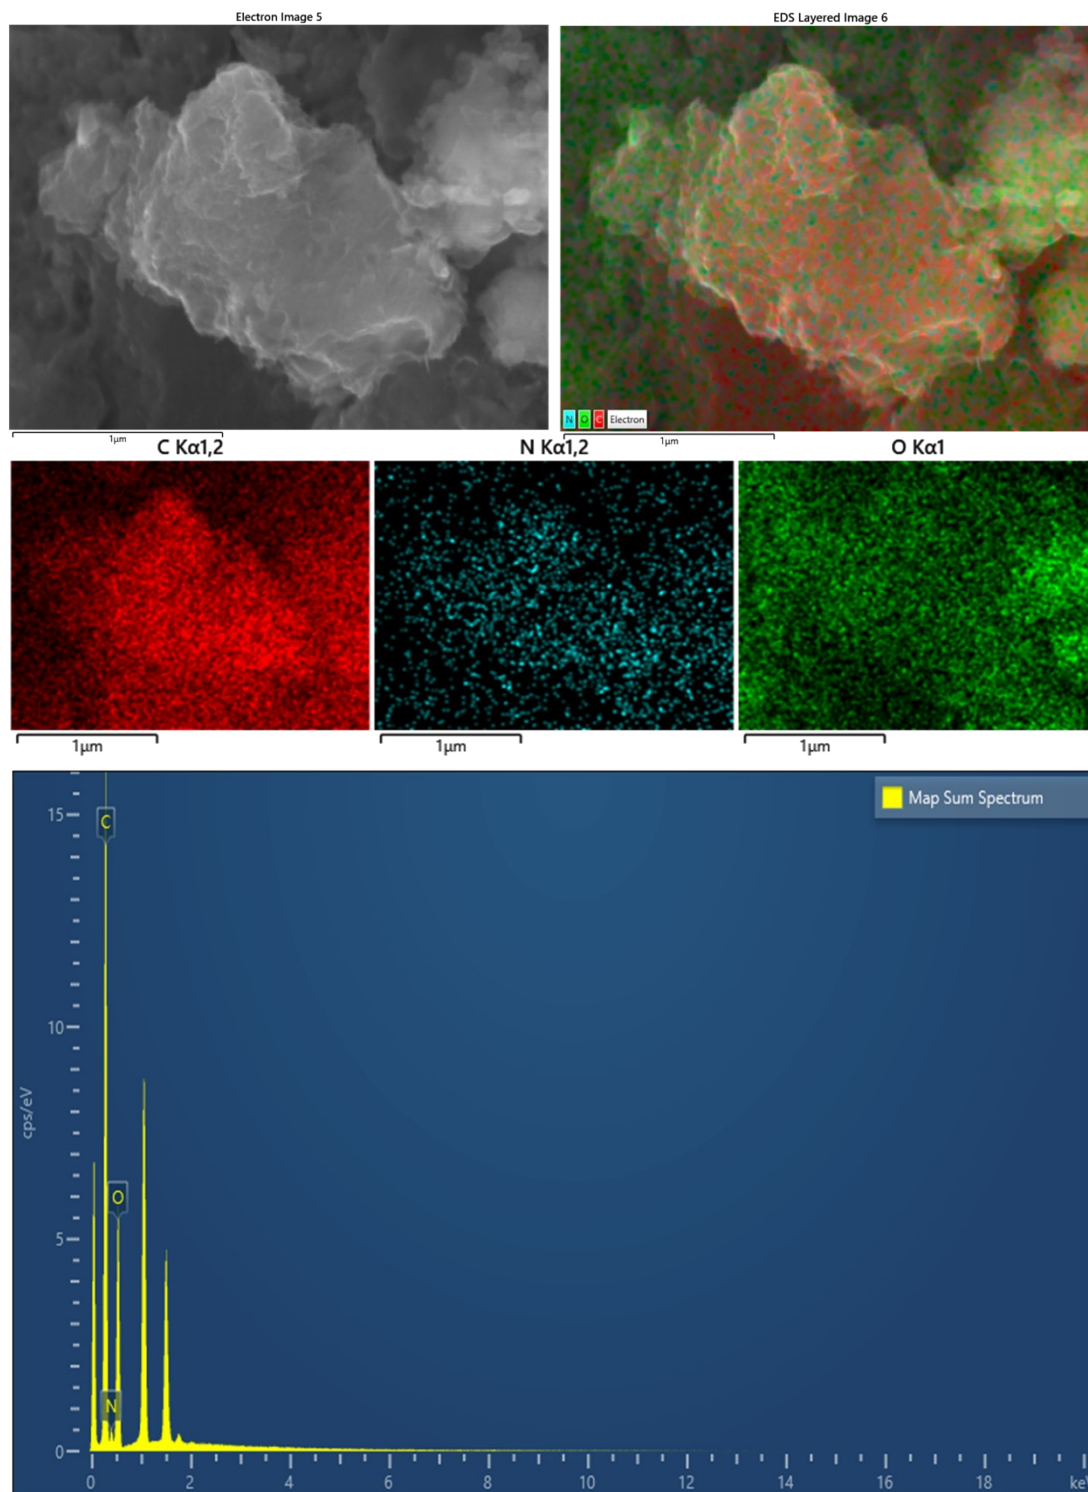

**Fig. S2.** EDS Spectrum for free standing NGr showing presence of C, N, O.

## 4. EDS Spectrum for Ce/NGr

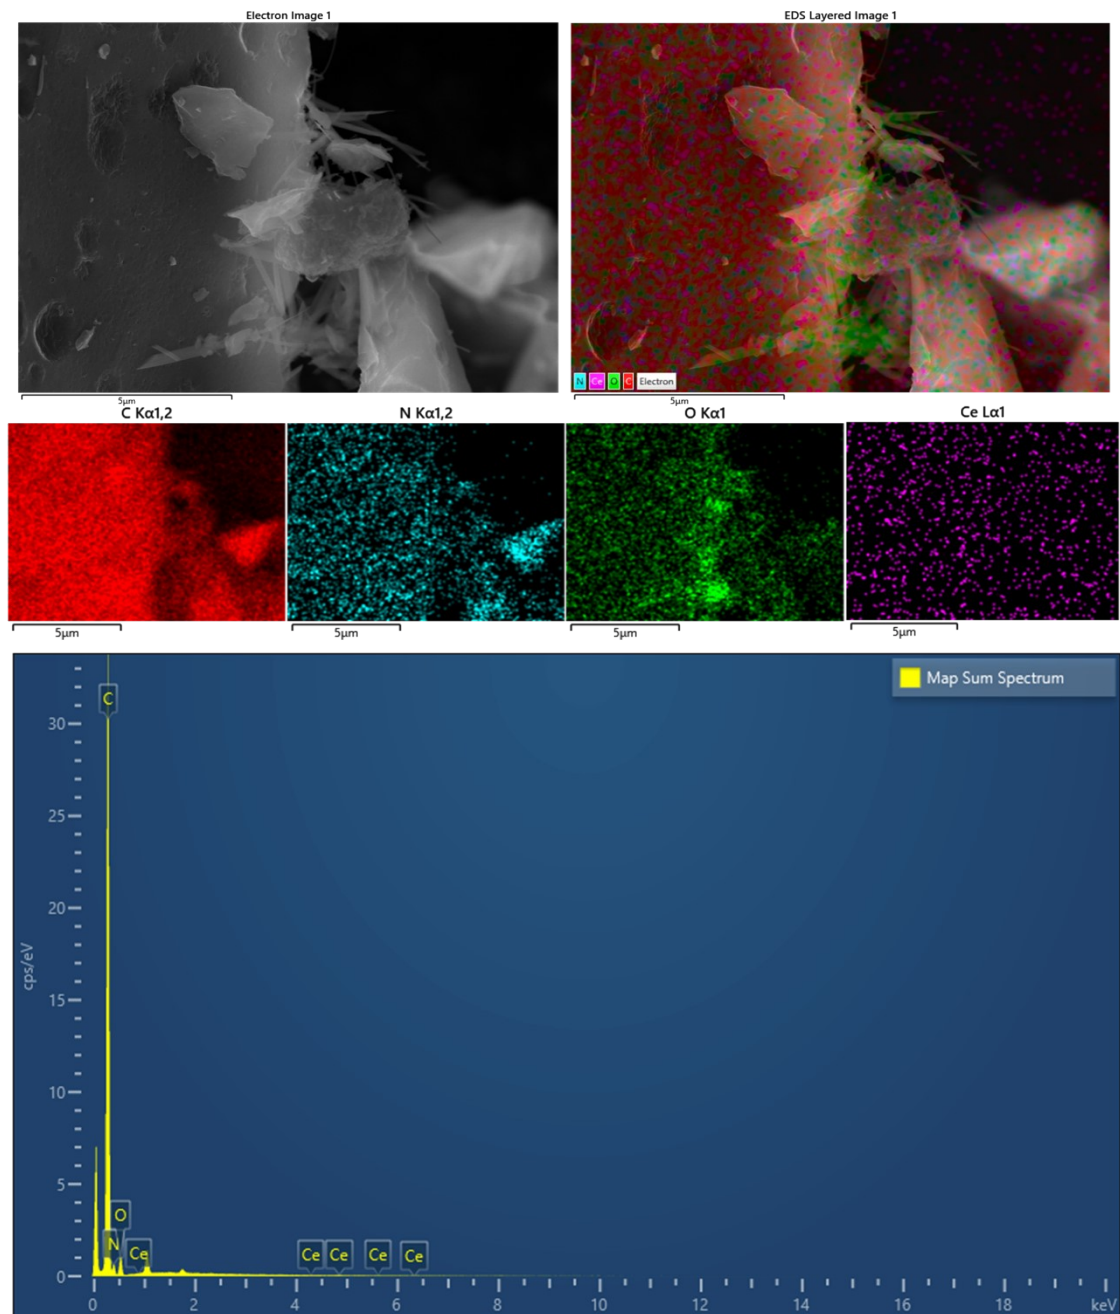

**Fig. S3.** EDS Spectrum for Ce/NGr showing presence of Ce, C, N and O

## 5. HR-TEM images

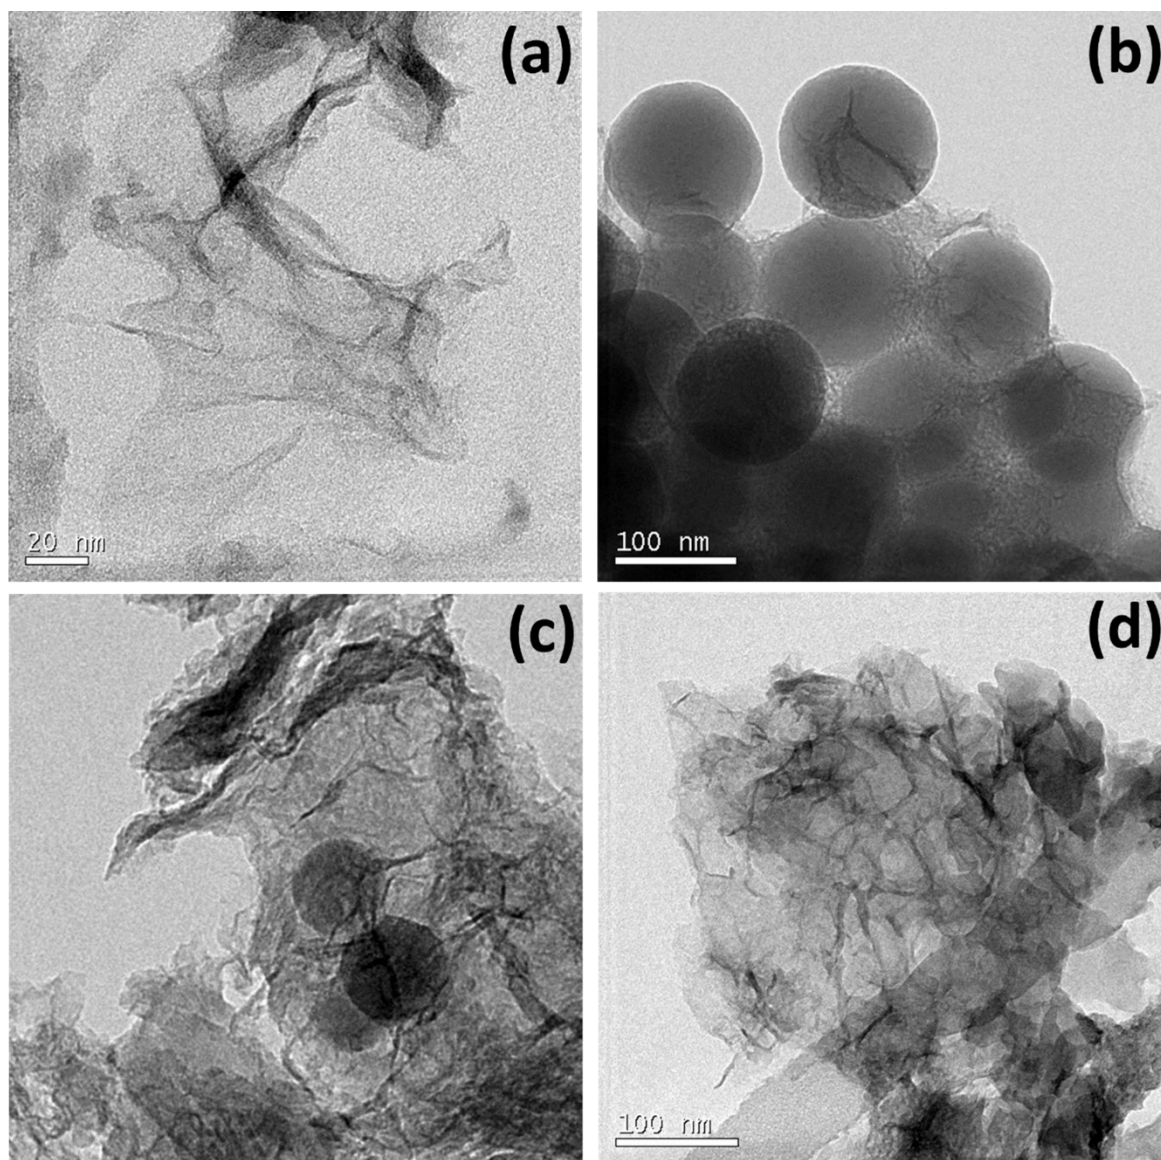

**Fig. S4.** (a) High-resolution TEM images showing (a) Free-standing nitrogen-doped graphene (NGr) (b) Free-standing nitrogen-doped graphene (NGr) with Silica doping (c) Silica covered with layered NGr (d) Cavities after removal of silica.

## 6. STEM images of NGR and Ce/NGr

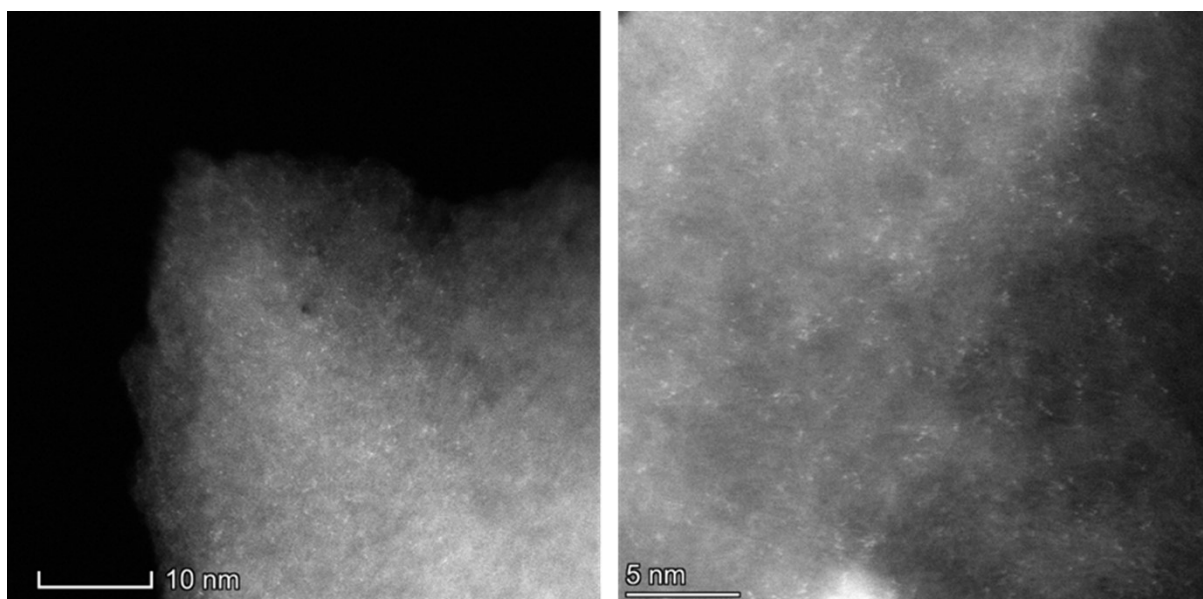

**Fig. S5.** STEM Images showing densely distributed Ce single atoms on NGr in 1Ce/NGr.

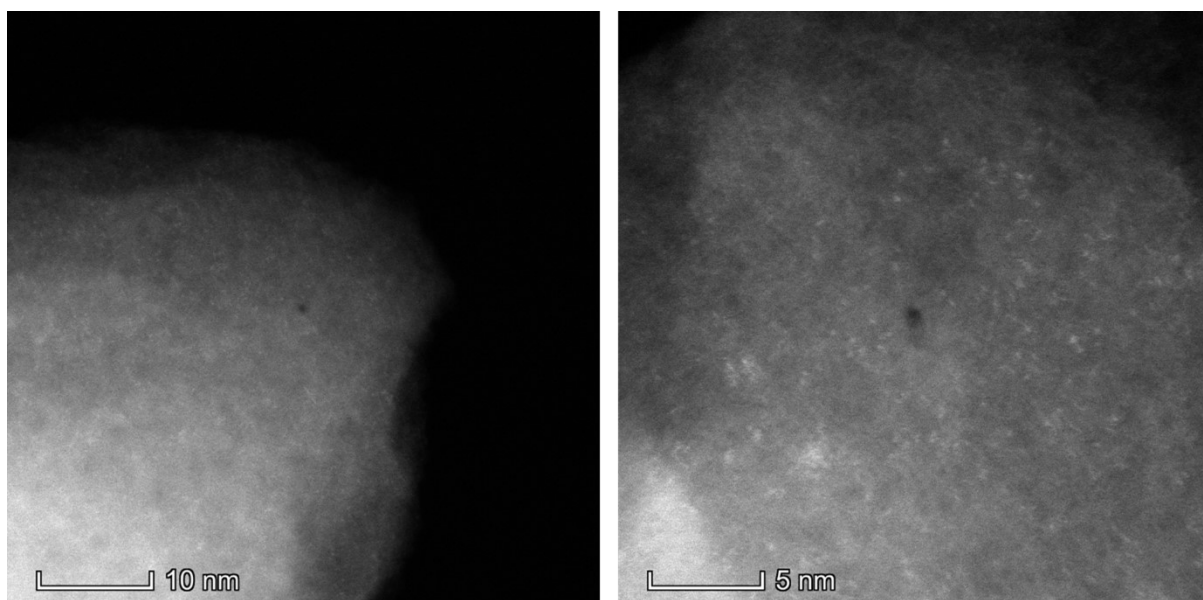

**Fig. S6.** STEM Images showing densely distributed Ce single atoms on NGr in 3Ce/NGr.



## 7. HER, Mass density, and EIS measurements of NGr, 1Ce/NGr, and 3Ce/NGr

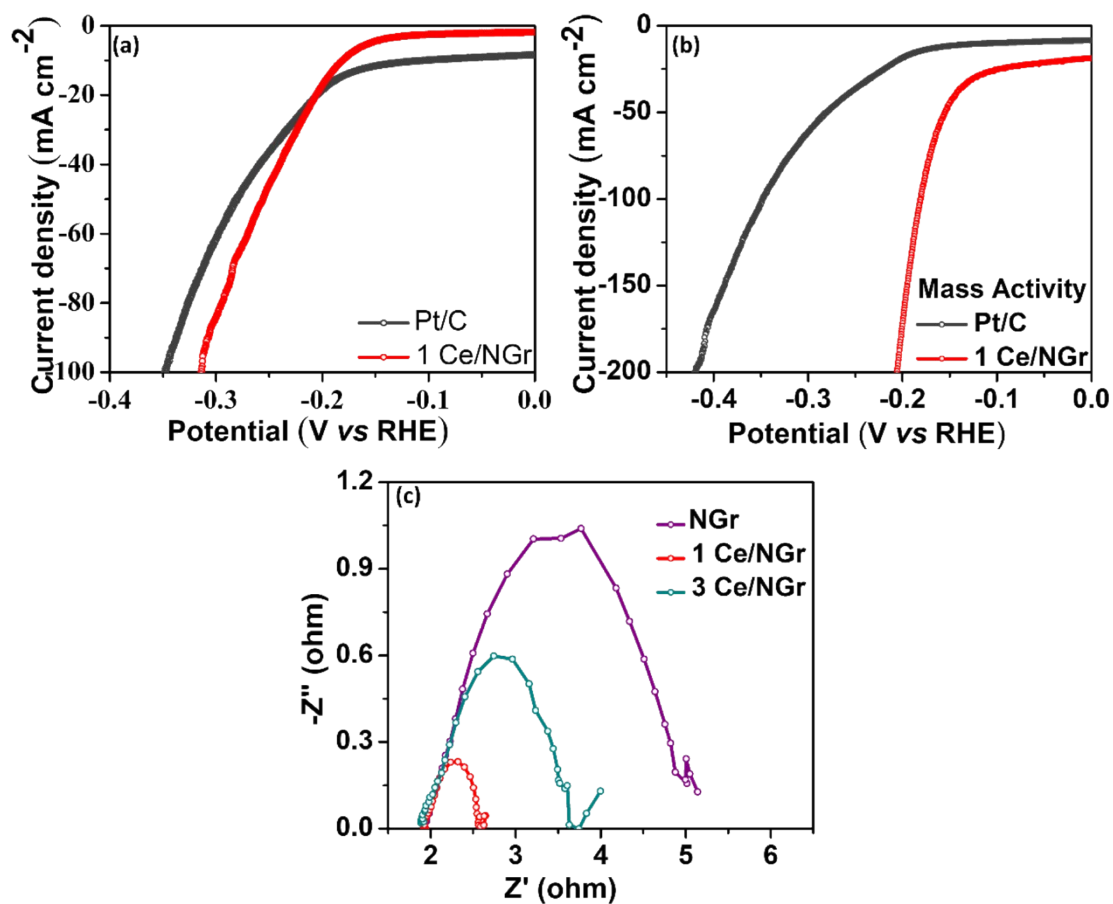

Fig. S7. (a) HER polarization curve for Pt/C and 1Ce/NGr, (b) mass density of Pt/C and 1Ce

## 8. CV cycle of Pt/C, NGr, 1Ce/NGr, and 3Ce/NGr

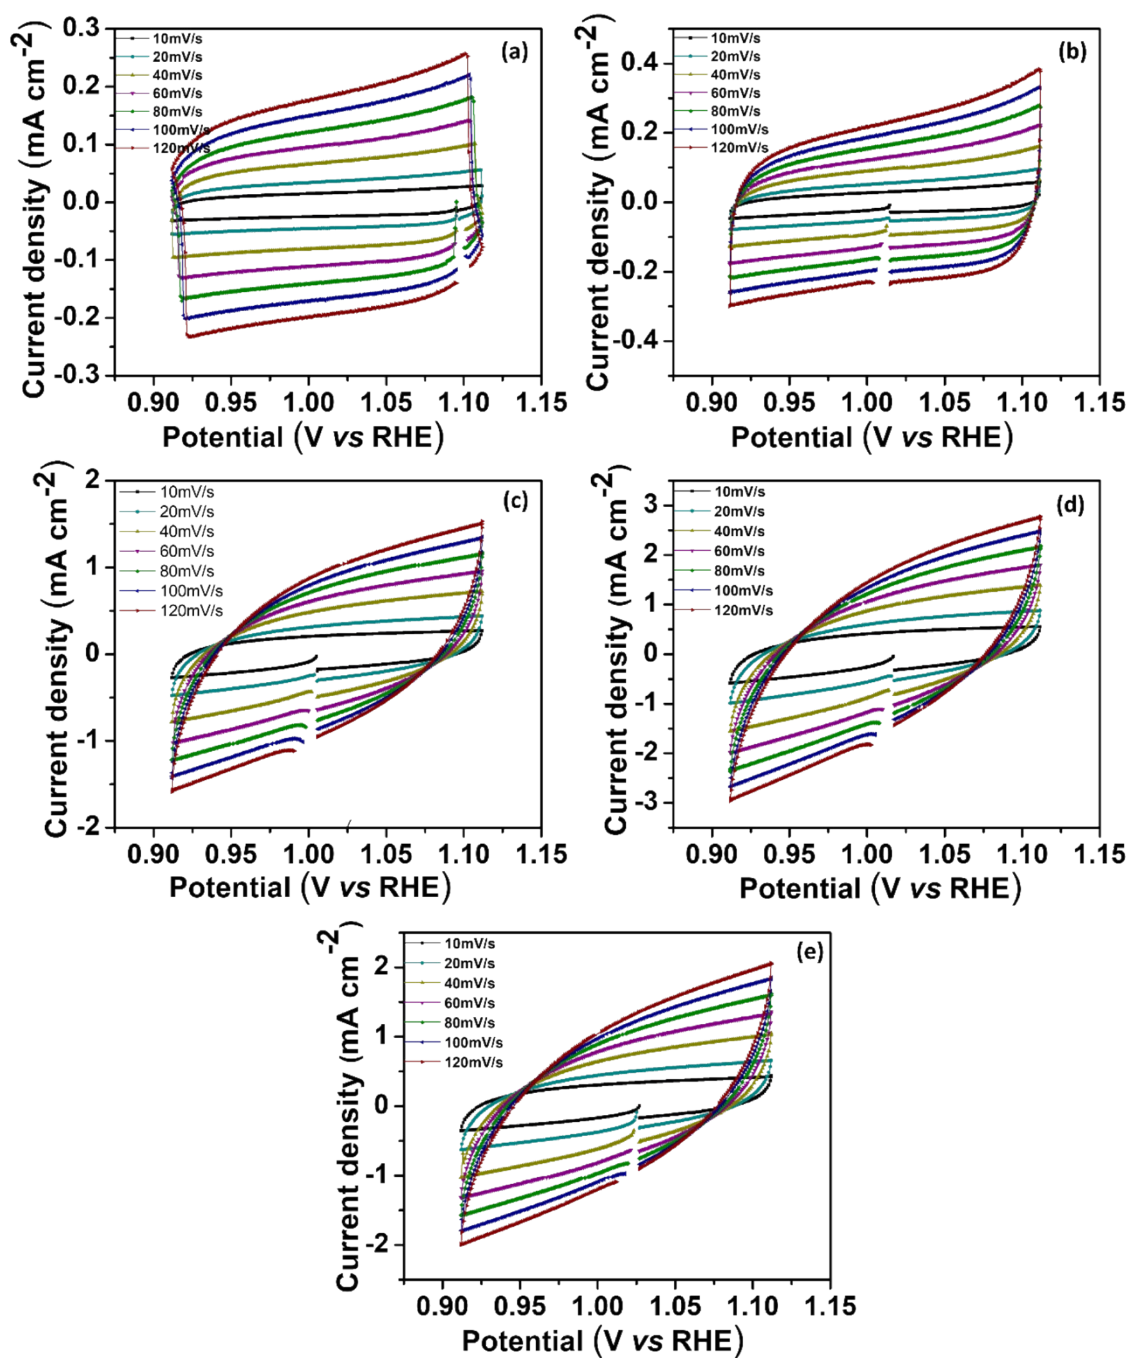

Fig. S8. CV cycle at different scan rates (a) Pt/C, (b) Ni foam, (c) NGr, (d) 1Ce/NGr, and (e)

## 9. I-t graph of NGr and 3Ce/NGr

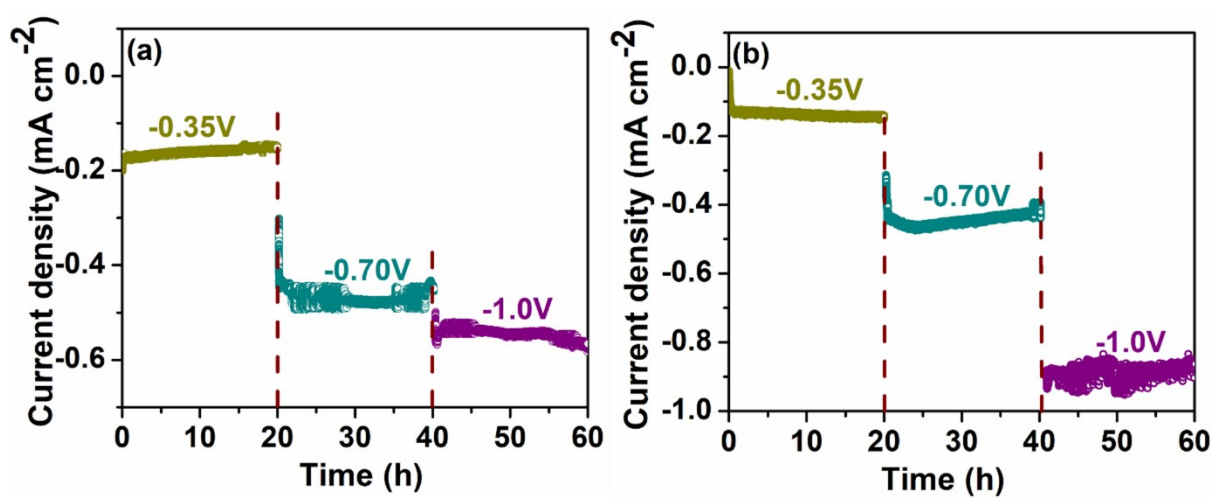

Fig. S9. (a) I-t graph of NGr, and (b) 3Ce/NGr at different potentials.

## 10. Electrochemical measurement of Ni foam, NGr, 1Ce/NGr, and 3Ce/NGr using a graphite rod

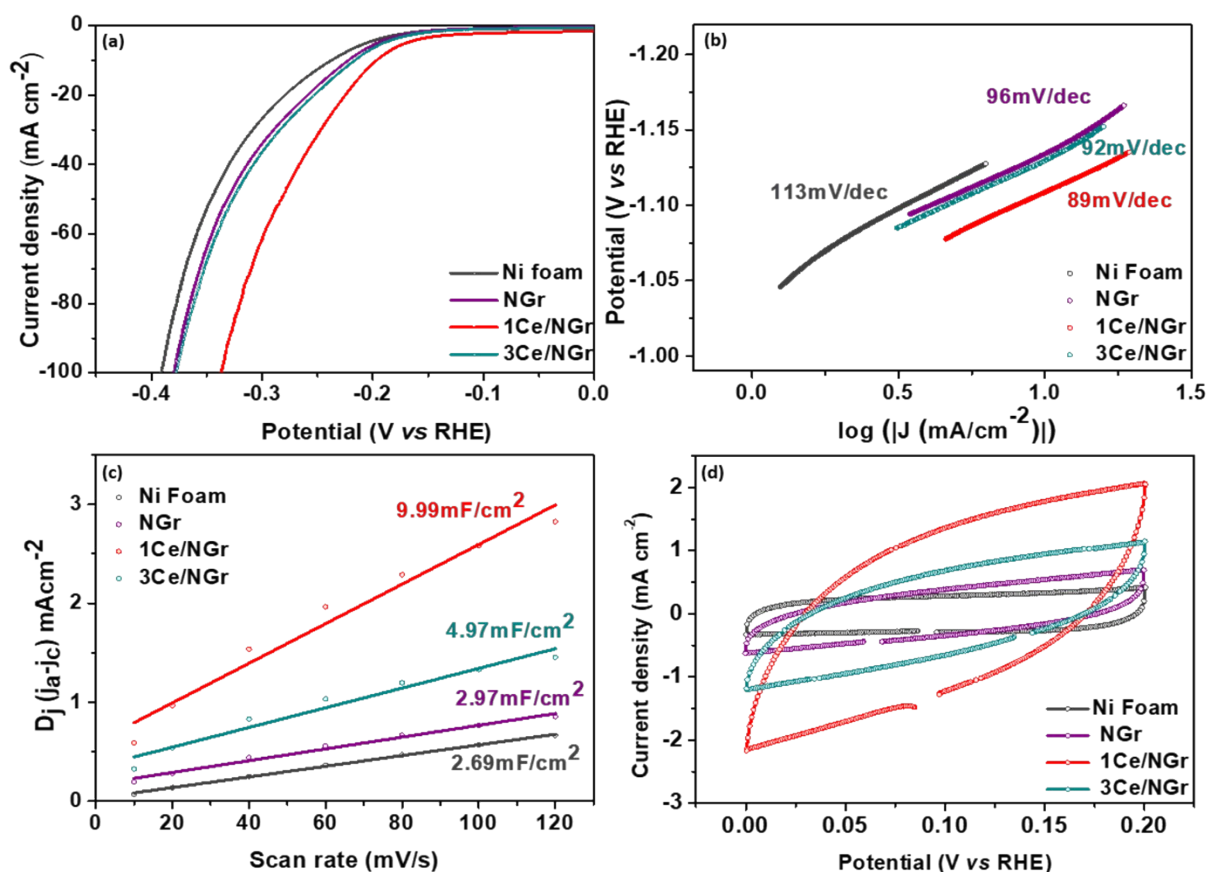

**Fig. S10.** (a) HER polarization curves for Ni foam, NGr, 1Ce/NGr and 3Ce/NGr, (b) tafel plot of Ni foam, NGr, 1Ce/NGr and 3Ce/NGr, (c) extraction of the double layer capacitance ( $C_{dl}$ ) of Ni foam, NGr, 1Ce/NGr and 3Ce/NGr, (d) CV cycle of Ni foam, NGr, 1Ce/NGr and 3Ce/NGr at 100mV/s us

## 11. CV cycle of NGr, 1Ce/NGr, and 3Ce/NGr

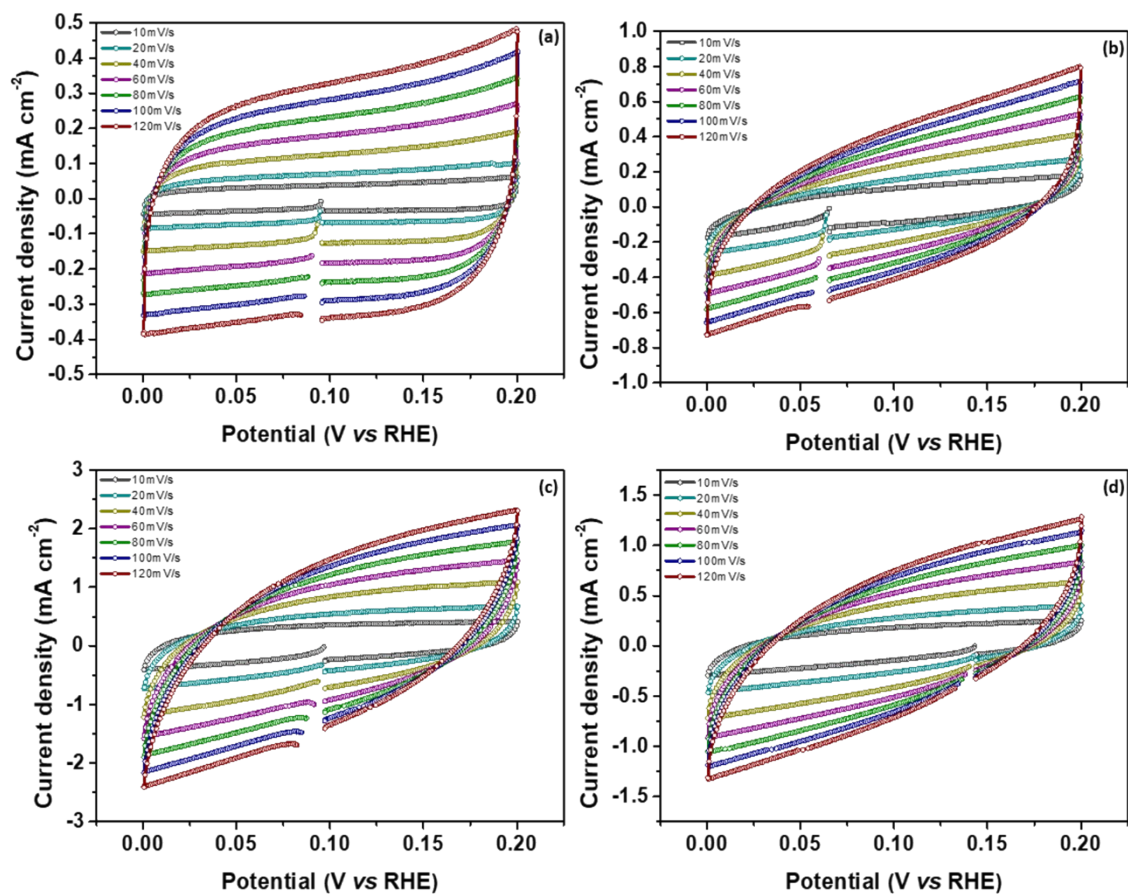

**Fig. S11.** CV cycle at different scan rates (a) Ni foam, (b) NGr, (c) 1Ce/NGr, and (d) 3Ce/NGr.

## 12. Fe-SEM, STEM, and XPS data after stability test of 1Ce/NGr and 3Ce/NGr

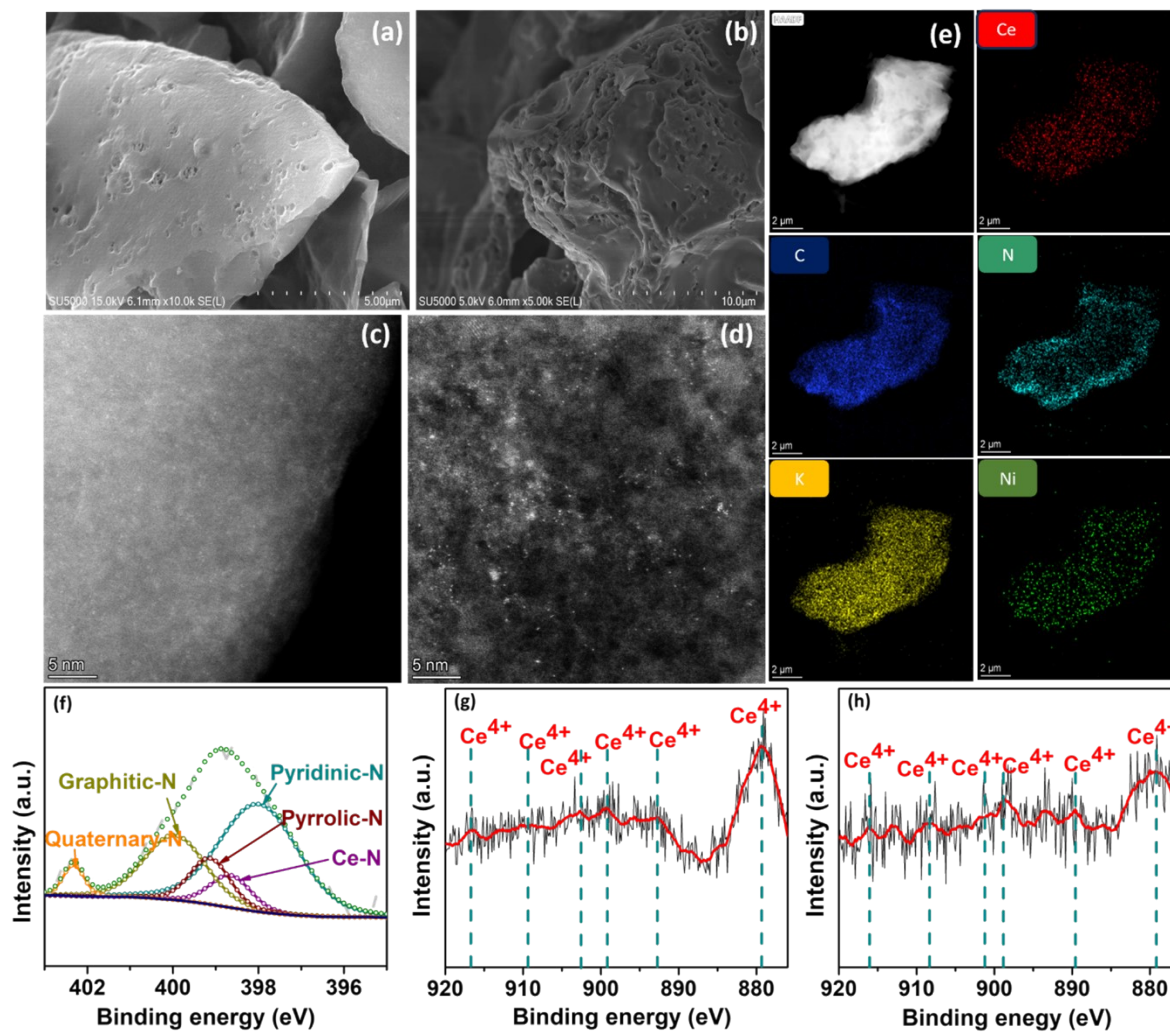

**Fig. S12.** (a) FE-SEM images of NGr after stability test, (b) porous structure of Ce/NGr after stability test, (c) aberration-corrected HAADF-STEM image after stability test for 1Ce/NGr, and (d) 3Ce/NGr, (e) elemental mapping of Ce, C and N after stability test, (f) N 1s f

### 13. FE-SEM images of Ce/NGr after stability test

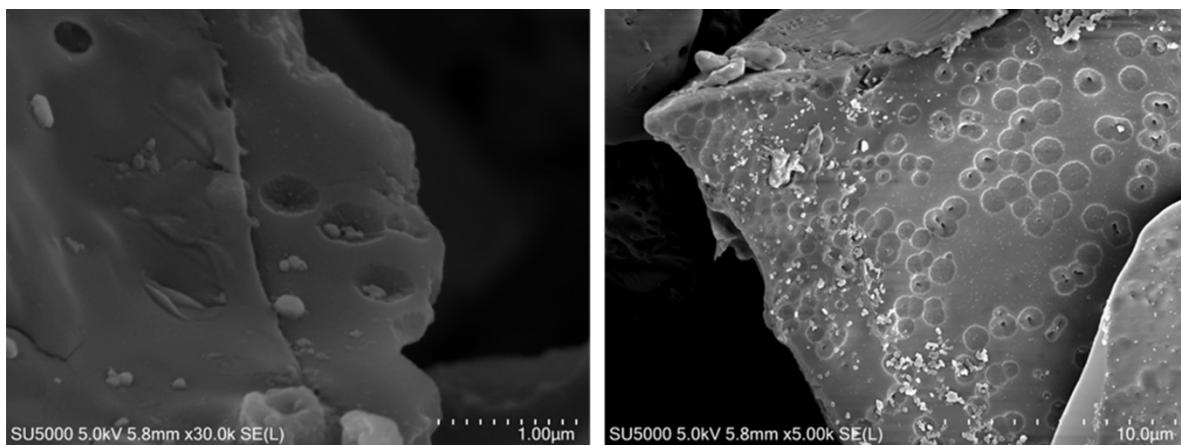

**Fig. S13.** FE-SEM images of Ce/NGr after stability test.

## 14. EDS Spectrum for free-standing NGr after stability test

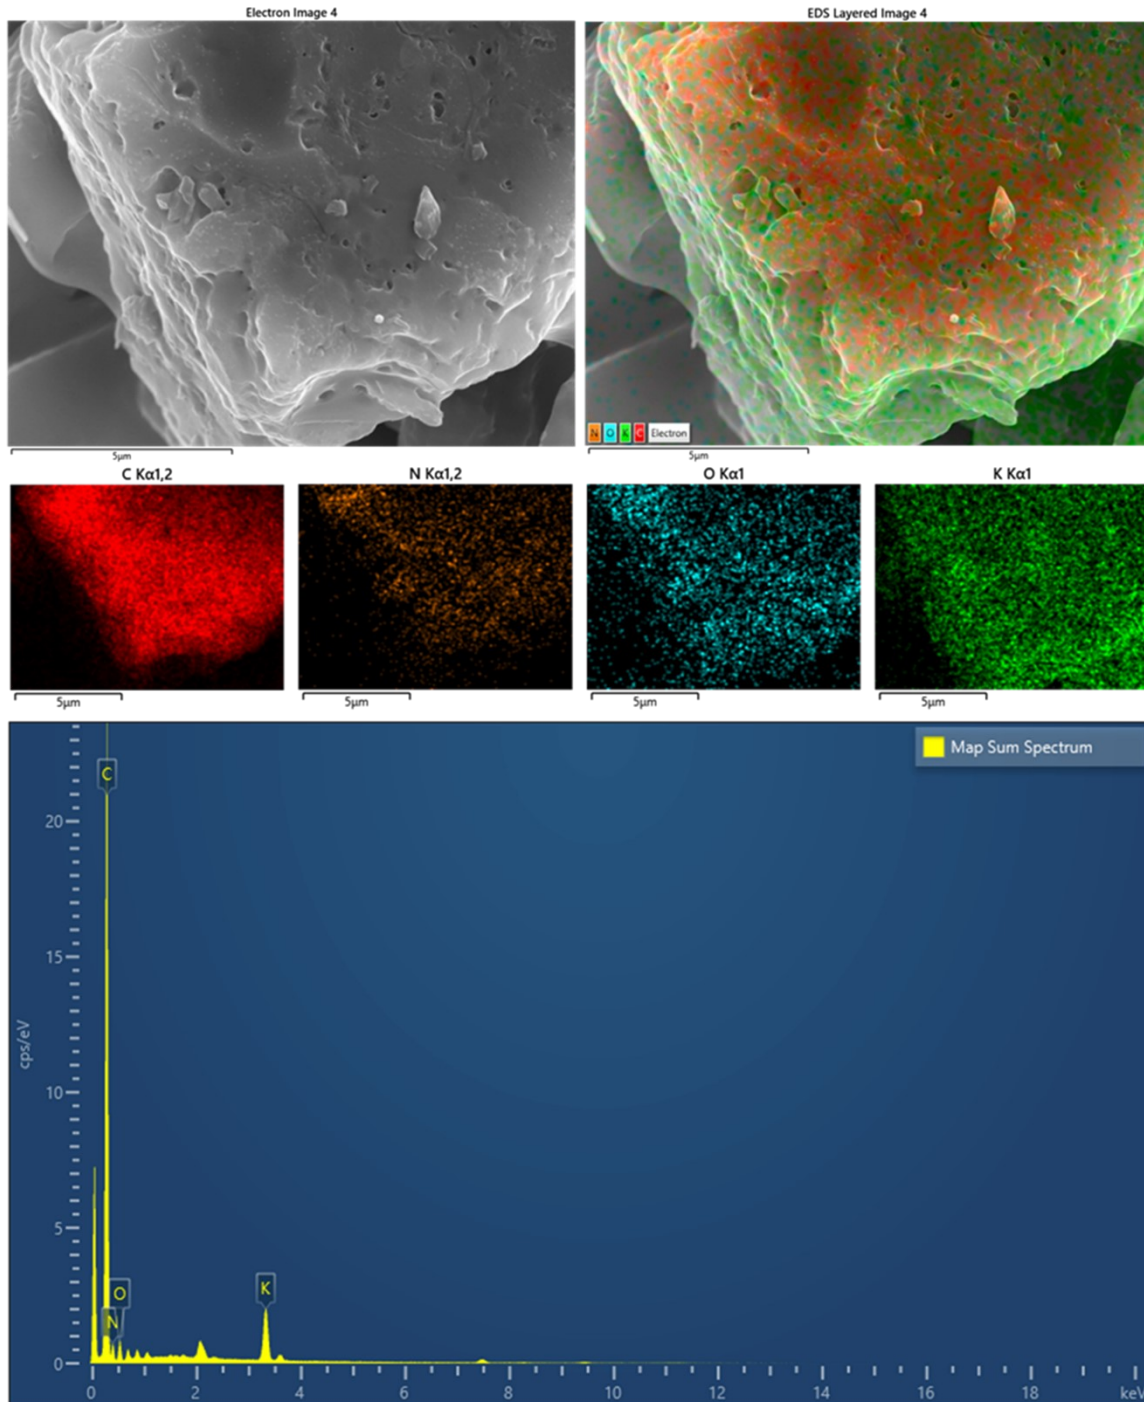

**Fig. S14.** EDS Spectrum for free standing NGr after stability test showing presence of



## 15. EDS Spectrum for free standing Ce/NGr after stability test

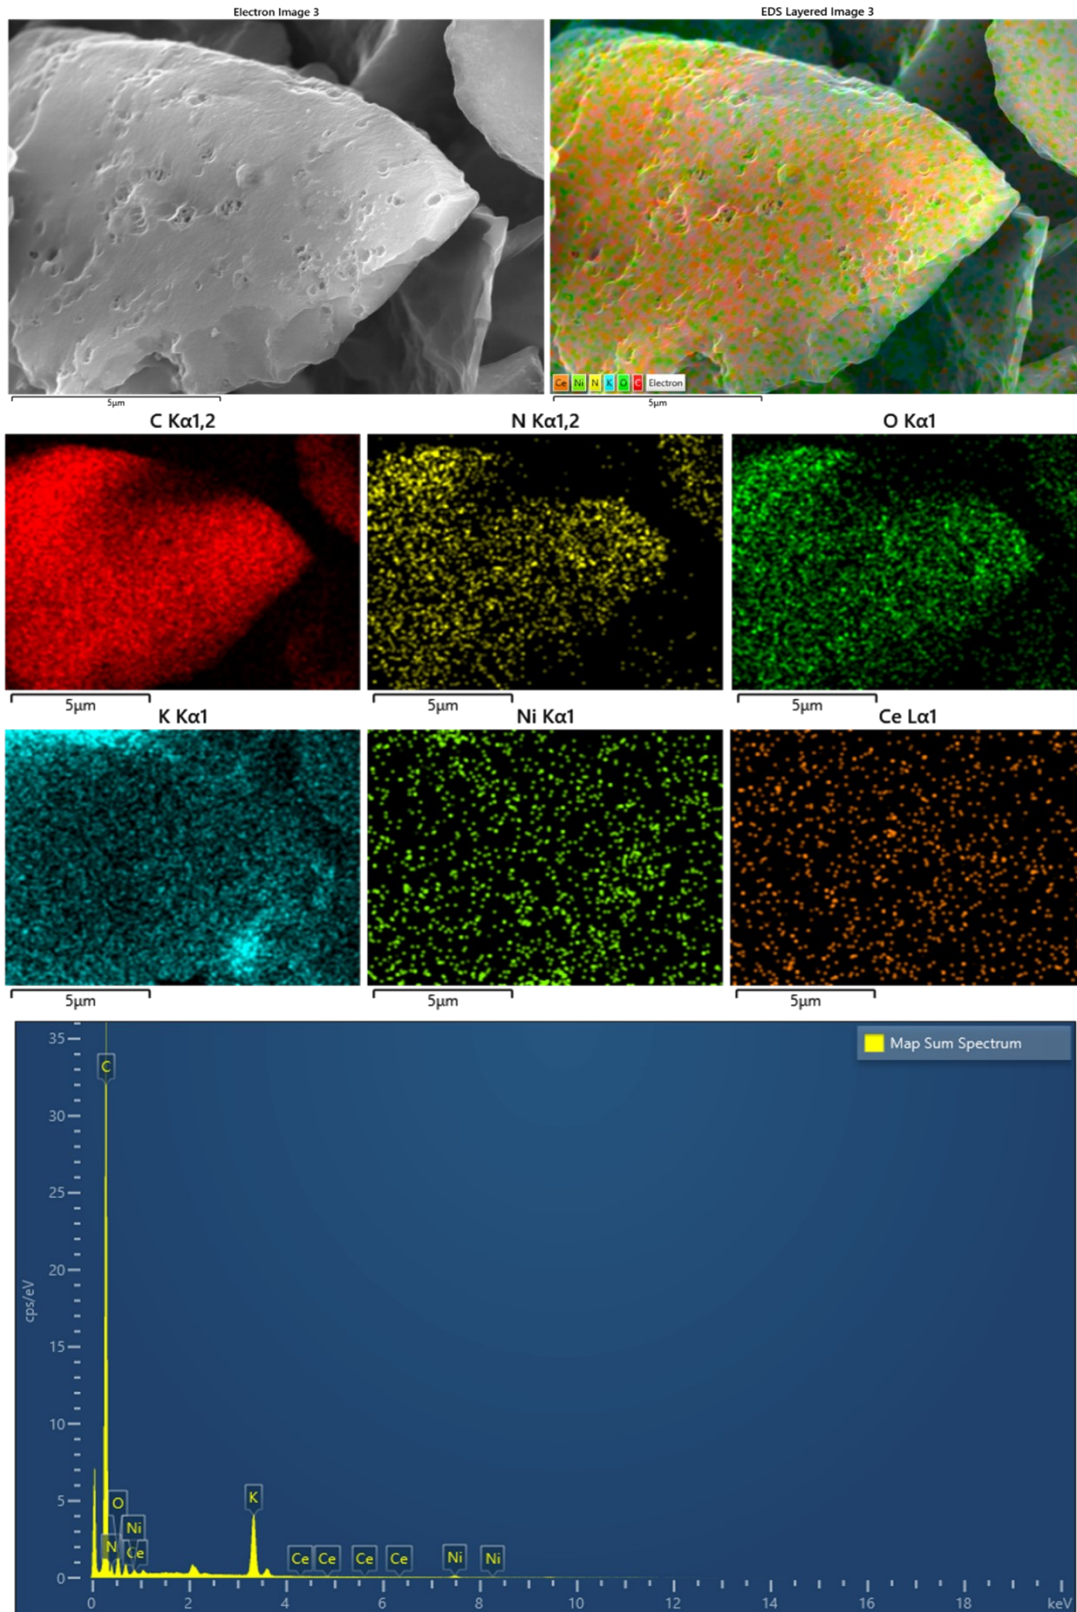

Fig. S15. EDS Spectrum for free standing Ce/NGr after stability test.

## 16. Comparison of HER active catalysts

**Table S1.** Comparison of HER active catalysts

| Catalysts                                                                         | Overpotential (mV, at 10 mA/cm <sup>2</sup> ) | Tafel slope (mV/dec) | electrolyte | Ref.                                                |
|-----------------------------------------------------------------------------------|-----------------------------------------------|----------------------|-------------|-----------------------------------------------------|
| Ce/NGr                                                                            | 180                                           | 83                   | 1 M KOH     | This work                                           |
| Co@CNT/CeO <sub>2</sub>                                                           | 181                                           | 118                  | 1 M KOH     | Int. J. Hydrog. Energy, 2020, 45, 3948-3958. [S1]   |
| 3D-rGO-CeO <sub>2</sub>                                                           | 192                                           | 112.8                | 1 M KOH     | Eur. J. Inorg. Chem., 2018, 3952-3959. [S2]         |
| Co <sub>NC-SA</sub> /N*-C                                                         | 194                                           | 91.9                 | 1 M KOH     | ACS Catal., 2022, 12, 10771-10780. [S3]             |
| Co/CeO <sub>2</sub> /Co <sub>2</sub> P/CoP@NC                                     | 195                                           | 66                   | 1 M KOH     | Int. J. Hydrog. Energy, 2020, 45, 30559-30570. [S4] |
| Ni-1T MoS <sub>2</sub>                                                            | 199                                           | 52.7                 | 1 M KOH     | Small, 2022, 18, 2107238. [S5]                      |
| Co-1T-MoS <sub>2</sub>                                                            | 261                                           | 88.5                 | 1 M KOH     | Small, 2022, 18, 2107238 [S5]                       |
| Fe-1T-MoS <sub>2</sub>                                                            | 269                                           | 168                  | 1 M KOH     | Small, 2022, 18, 2107238. [S5]                      |
| g-C <sub>3</sub> N <sub>4</sub> /CeO <sub>2</sub> /Fe <sub>3</sub> O <sub>4</sub> | 310                                           | 102                  | 1 M KOH     | Chem Cat Chem, 2018, 10, 5587. [S6]                 |
| Pr <sub>2</sub> CeO <sub>3</sub>                                                  | 374                                           | 110                  | 1 M KOH     | Ceram. Int., 48, 13, 2022. [S7]                     |

## References

- [S1] Yupeng Xiao, Wenju Wang, Qiao Wu, *Int. J. Hydrog. Energy*, 2020, 45, 3948-3958.
- [S2] Liu, M., Ji, Z., Shen, X., Zhou, H., Zhu, J., Xie, X., Song, C., Miao, X., Kong, L. and Zhu, G. (2018), *Eur. J. Inorg. Chem.*, 2018, 3952-3959.
- [S3] Minmin Wang, Kaian Sun, Wanliang Mi, Chao Feng, Zekun Guan, Yunqi Liu, and Yuan Pan, *ACS Catal.*, 2022, 12, 10771-10780.
- [S4] Xue-Zhi Song, Qiao-Feng Su, Shao-Jie Li, Gui-Chao Liu, Nan Zhang, Wen-Yu Zhu, Zi-Hao Wang, Zhenquan Tan, *Int. J. Hydrog. Energy*, 2020, 45, 30559-30570.
- [S5] Wang, G., Zhang, G., Ke, X., Chen, X., Chen, X., Wang, Y., Huang, G., Dong, J., Chu, S., Sui, M., *Small*, 2022, 18, 2107238.
- [S6] J. Rashid, N. Parveen, T. u. Haq, A. Iqbal, S. H. Talib, S. U. Awan, N. Hussain, M. Zaheer, *Chem Cat Chem*, 2018, 10, 5587.
- [S7] Tauseef Munawar, Faisal Mukhtar, Muhammad Shahid Nadeem, Sumaira Manzoor, Muhammad Naeem Ashiq, Muhammad Riaz, Sana Batool, Murtaza Hasan, Faisal Iqbal, *Ceram. Int.*, 2022, 48, 19150-19165.
